# Supplementary material for: Metformin sensitizes the response of oral squamous cell carcinoma to cisplatin treatment through inhibition of NF-κB/HIF-1α signal axis
Source: PubMed Central journal article supplement (PMC5071902; doi:10.1038/srep35788), 2016-10-20

# **Metformin sensitizes the response of oral squamous cell carcinoma to cisplatin treatment through inhibition of NF- $\kappa$ B/HIF-1 $\alpha$ signal axis**

Qi Xiaofeng<sup>1</sup>, Xu Wenguang<sup>1</sup>, Xie Junqi<sup>1</sup>, Wang Yufeng<sup>1</sup>, Han Shengwei<sup>1</sup>, Wei Zheng<sup>1</sup>,  
Ni Yanhong<sup>2</sup>, Dong Yingchun<sup>3</sup>, Han Wei<sup>1,2\*</sup>

1 Department of Oral and Maxillofacial Surgery, Nanjing Stomatological Hospital, Medical School of Nanjing University, No 30 Zhongyang Road, Nanjing, China

2 Central Laboratory of Stomatology, Nanjing Stomatological Hospital, Medical School of Nanjing University, Nanjing, P.R China

3 Department of Anesthesia, Nanjing Stomatological Hospital, Medical School of Nanjing University, Nanjing, P.R China

**The first two authors contribute equally to this paper.**

**Correspondence to:**

**Han Wei**

**Email: [doctorhanwei@hotmail.com](mailto:doctorhanwei@hotmail.com)**

**Tel: +86 25 83620140**

**Fax: +86 25 83620173**

## Supplementary File

**Supplementary Figure S1.** Expression of HIF-1 $\alpha$  protein in HSC3, SCC3, TCA8113 and CAL27 (The band of this cell line was not displayed in the cropped blots of the main paper) cells transfected with or without HIF-1 $\alpha$  siRNA under hypoxic conditions for 48 h.

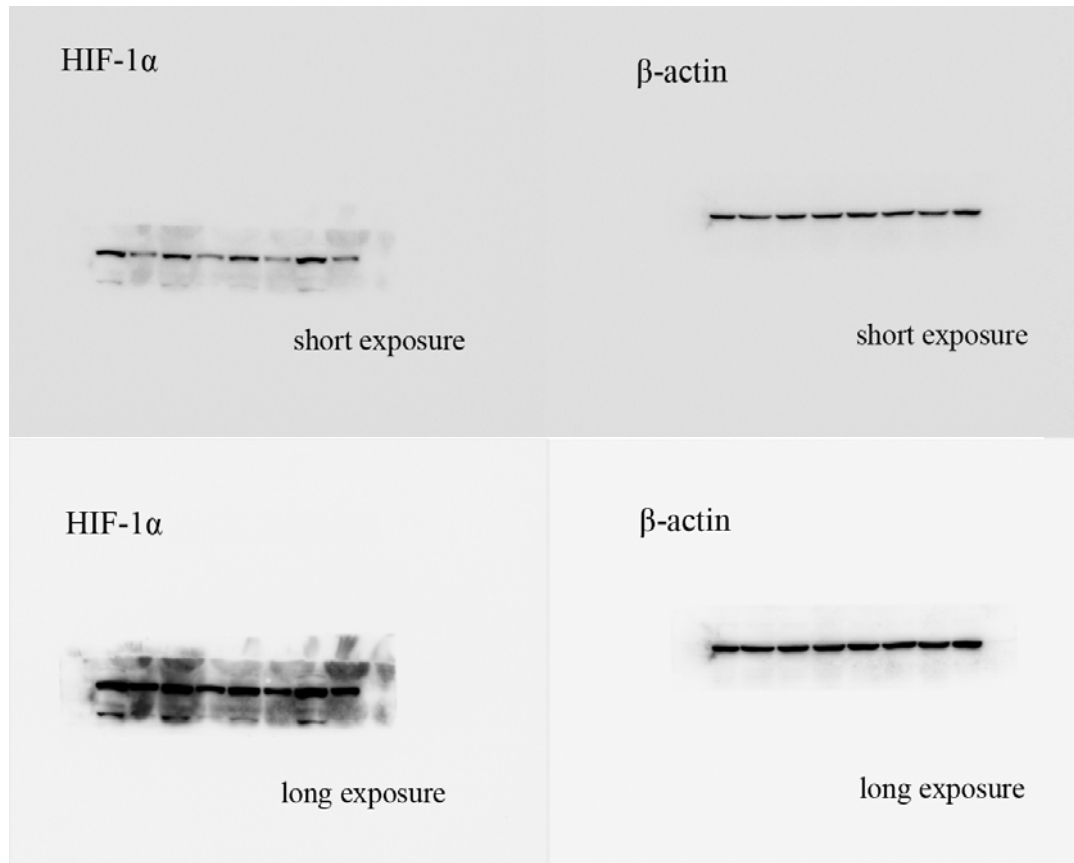

**Supplementary Figure S2.** Expression of Bcl-2, GLUT-1, and HIF-1 $\alpha$  in HSC3, SCC3, TCA8113 and CAL27 (The band of this cell line was not displayed in the cropped blots of the main paper) cells transfected with or without HIF-1 $\alpha$  siRNA under hypoxic conditions for 48 h.

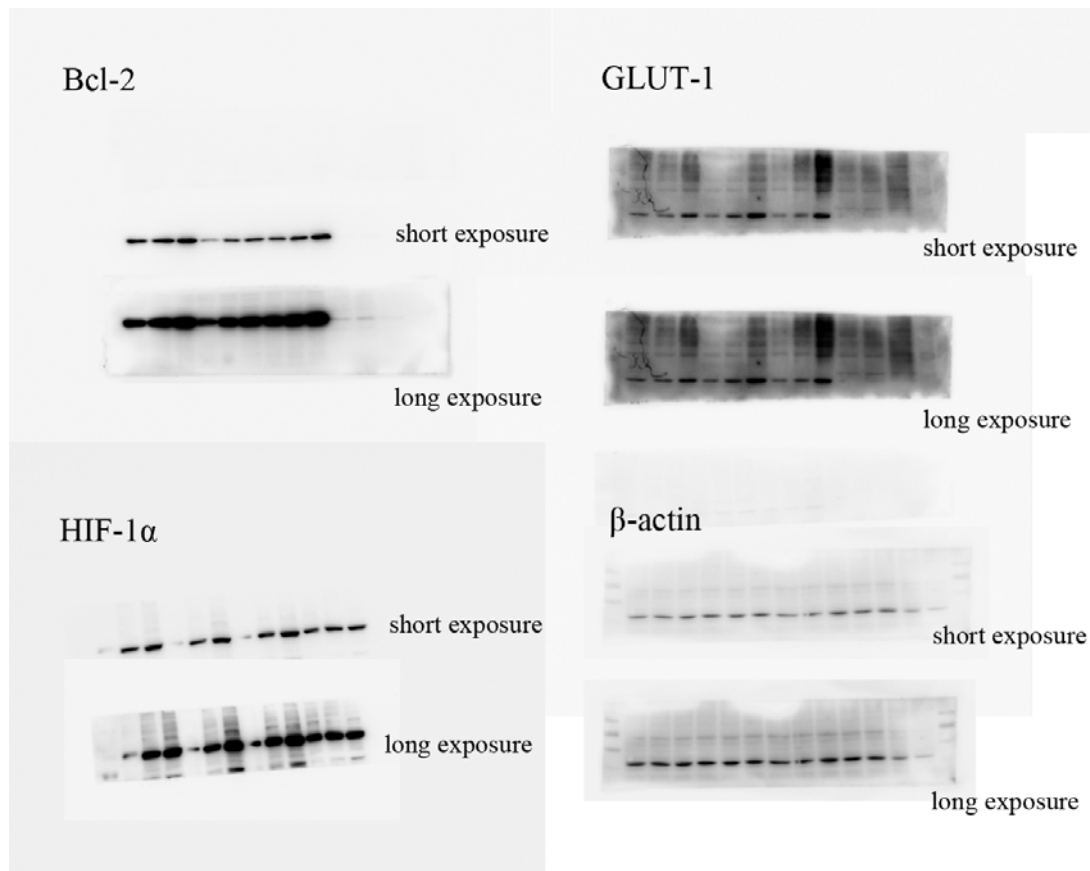

**Supplementary Figure S3.** Expression of GLUT-1, Bcl-2, and HIF-1 $\alpha$  in HSC3, SCC3, TCA8113 and CAL27(The band of this cell line was not displayed in the cropped blots of the main paper) cells treated with or without metformin (10  $\mu$ M) under hypoxic or normoxic conditions for 48 h.

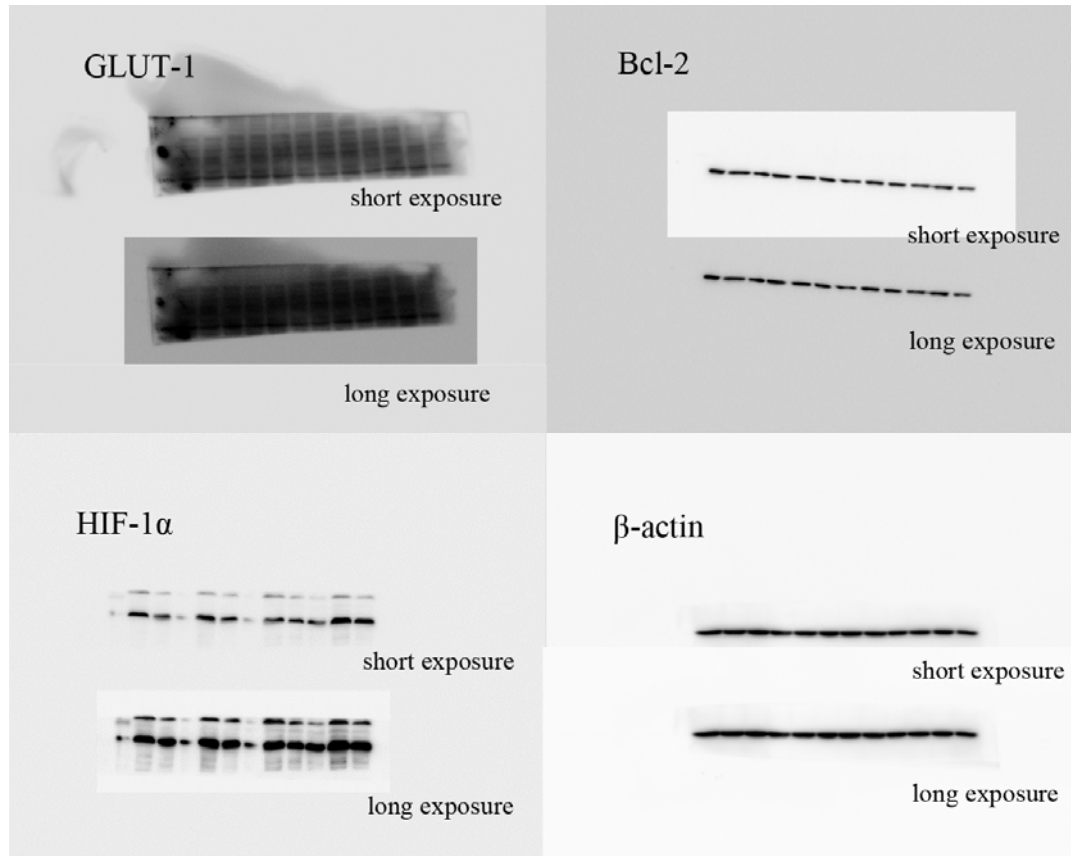

**Supplementary Figure S4.** Expression of HIF-1 $\alpha$ , p65, and p-p65 in HSC3 cells transfected with or without p65 siRNA under hypoxic conditions for 48 h.

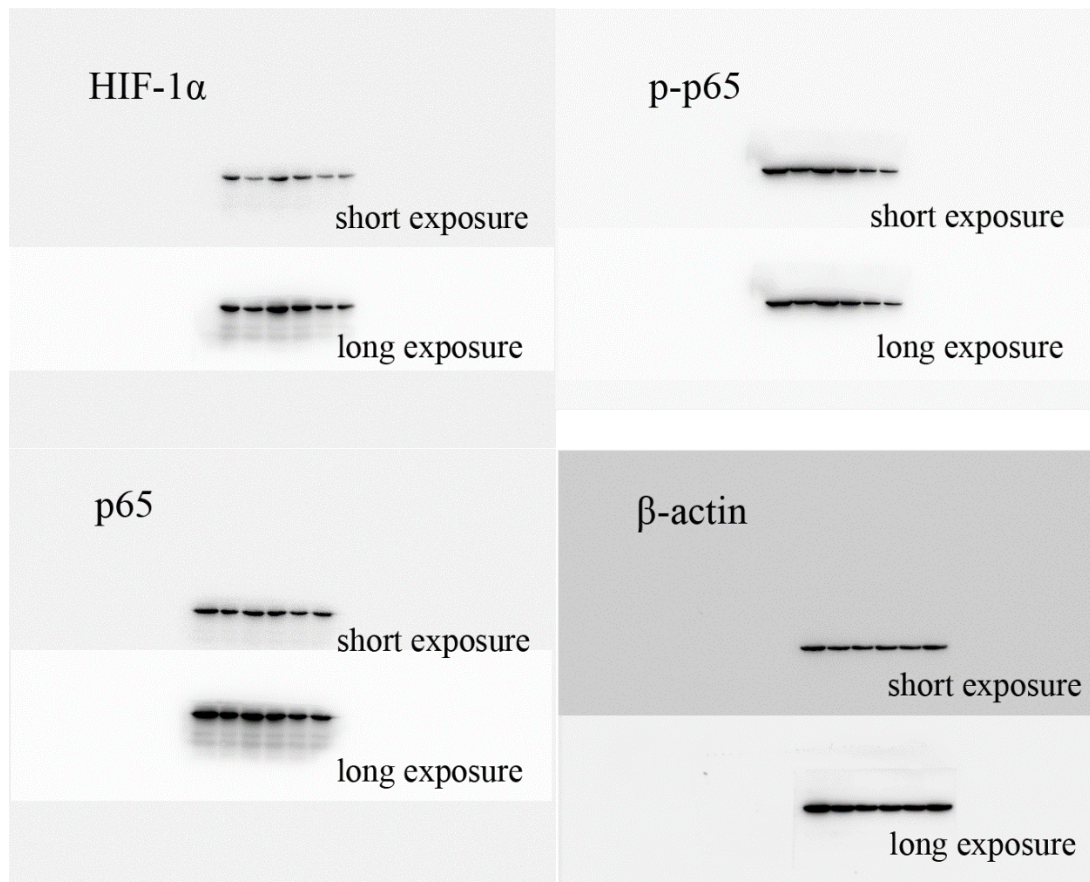

**Supplementary Figure S5.** Expression of p-AMPK and AMPK in HSC3, SCC3, and TCA8113 cells was detected under normoxic conditions, hypoxic conditions treated with or without metformin for 48 h.

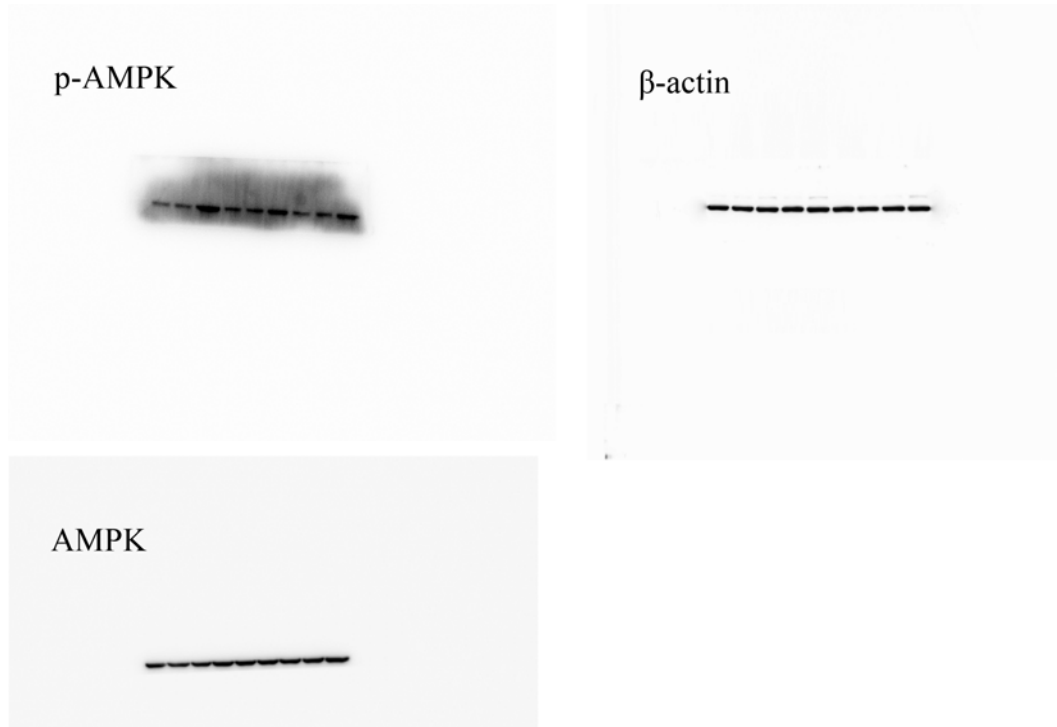

Supplement: srep35788-s1.pdf [file srep35788-s1.pdf]
